# Supplementary material for: Selective bioorthogonal probe for N-glycan hybrid structures
Source: Research Square preprint supplement (doi:10.21203/rs.3.rs-3093724/v1), 2023-08-01
Supplement: Supplementary file 1 [file 79a2358674412363dc18c35e.xlsx]

## Sheet: Fig 1a
b-elimination
Before Click										After click
H2O				NaOH						H2O				NaOH
RL2	GAPDH	RL2/GAPDH		RL2	GAPDH	RL2/GAPDH				TAMRA	GAPDH	TAMRA/GAPDH		TAMRA	GAPDH	TAMRA/GAPDH
68000	267000	0.254682		0	263000	0				0	87600	0		0	8490	0
61500	246000	0.25		0	317000	0				0	76300	0		0	8170	0
66500	287000	0.231707		0	292000	0				0	45000	0		0	8040	0
66900	212000	0.315566		0	340000	0				0	83600	0		0	8870	0
67800	221000	0.306787		0	322000	0				2130000	112000	19.0179		3920000	190000	20.6316
68400	229000	0.29869		0	319000	0				1830000	77900	23.4917		4120000	189000	21.7989
67900	217000	0.312903		0	347000	0				1980000	91500	21.6393		4190000	187000	22.4064
68100	264000	0.257955		0	350000	0				2010000	96700	20.7859		4210000	186000	22.6344

## Sheet: Fig 1b
PNGase F
Before click									After click
	RL2	ConA	GAPDH		RL2/GAPDH	ConA/GAPDH				TAMRA	ConA	GAPDH		TAMRA/GAPDH	ConA/GAPDH
DMSO, (-) PNGase F	114000	458000	72100		1.58114	6.35229			DMSO, (-) PNGase F	0	420000	40400		0	10.396
DMSO, (+) PNGase F	127000	409000	82000		1.54878	4.9878			DMSO, (+) PNGase F	0	445700	45800		0	9.73144
MM-JH-1, (-) PNGase F	129000	487000	83100		1.55235	5.86041			MM-JH-1, (-) PNGase F	721000	1300000	86200		8.36427	15.0812
MM-JH-1, (+) PNGase F	130000	384000	84800		1.53302	4.5283			MM-JH-1, (+) PNGase F	0	458000	58600		0	7.8157
DMSO, (-) PNGase F	99500	404000	65000		1.53077	6.21538			DMSO, (-) PNGase F	0	397000	38200		0	10.3927
DMSO, (+) PNGase F	108000	325000	72000		1.5	4.51389			DMSO, (+) PNGase F	0	424000	43600		0	9.72477
MM-JH-1, (-) PNGase F	119000	438000	75600		1.57407	5.79365			MM-JH-1, (-) PNGase F	638000	1120000	74100		8.60999	15.1147
MM-JH-1, (+) PNGase F	122000	331000	78500		1.55414	4.21656			MM-JH-1, (+) PNGase F	0	370000	47300		0	7.82241
DMSO, (-) PNGase F	131000	527000	84000		1.55952	6.27381			DMSO, (-) PNGase F	0	438000	42100		0	10.4038
DMSO, (+) PNGase F	135000	417000	88100		1.53235	4.73326			DMSO, (+) PNGase F	0	474000	48700		0	9.73306
MM-JH-1, (-) PNGase F	141000	551000	92000		1.53261	5.98913			MM-JH-1, (-) PNGase F	782000	1400000	92800		8.42672	15.0862
MM-JH-1, (+) PNGase F	139000	396000	91200		1.52412	4.34211			MM-JH-1, (+) PNGase F	0	490000	62900		0	7.79014

## Sheet: Fig 2a
OSMI-I
DMSO, 0 uM OSMI						MM-JH-1, 0 uM OSMI						MM-JH-1, 5 uM OSMI						MM-JH-1, 10 uM OSMI
RL2	AF488	DAPI	RL2/DAPI	AF488/DAPI		RL2	AF488	DAPI	RL2/DAPI	AF488/DAPI		RL2	AF488	DAPI	RL2/DAPI	AF488/DAPI		RL2	AF488	DAPI	RL2/DAPI	AF488/DAPI
217486	0	909636	0.239091	0		427951	1657688	1609738	0.265851	1.02979		110494	1791191	1105558	0.0999441	1.62017		42908	1111818	992379	0.0432375	1.12036
180500	0	647469	0.278778	0		324179	1842833	1236003	0.26228	1.49096		82961	1232644	1038204	0.0799082	1.18728		27904	1252957	840918	0.0331828	1.48999
134691	0	571689	0.235602	0		345296	1651539	1136290	0.30388	1.45345		67837	1006778	952246	0.0712389	1.05727		29433	1342804	932306	0.0315701	1.4403
130710	0	635036	0.205831	0		416102	1573903	1303279	0.319273	1.20765		66793	1276088	1048201	0.0637216	1.21741		33803	915640	906500	0.0372896	1.01008
207526	0	784462	0.264546	0		308916	1205495	1043195	0.296125	1.15558		86829	1282310	1344287	0.0645911	0.953896		48754	1085381	863872	0.0564366	1.25641
245135	0	879352	0.278768	0		325923	1213652	1207273	0.269966	1.00528		85735	1181122	1326376	0.0646385	0.890488		55068	1817162	1098228	0.0501426	1.65463
192567	0	545117	0.353258	0		404276	1279935	1175118	0.34403	1.0892		78920	1358440	1235127	0.0638963	1.09984		40659	1217087	809184	0.0502469	1.50409
267209	0	806389	0.331365	0		438925	2356410	1620859	0.270798	1.4538		80394	1050813	862126	0.0932509	1.21886		35296	924560	755050	0.0467466	1.2245
255868	0	436651	0.585978	0		380309	1436308	1322358	0.287599	1.08617		74489	1311002	1030612	0.0722765	1.27206		27773	816308	648670	0.0428153	1.25843
275421	0	707816	0.389114	0		407562	1632169	1099238	0.370768	1.48482		81788	1504390	759956	0.107622	1.97958		39008	1051654	1023480	0.0381131	1.02753

## Sheet: Fig 2b
Tunicamycin_confocal
0 ug/mL						5 ug/mL						10 ug/mL						20 ug/mL
Calnexin	AF488	DAPI	Calnexin/DAPI	AF488/DAPI		Calnexin	AF488	DAPI	Calnexin/DAPI	AF488/DAPI		Calnexin	AF488	DAPI	Calnexin/DAPI	AF488/DAPI		Calnexin	AF488	DAPI	Calnexin/DAPI	AF488/DAPI
70537.9	77980.2	34170	2.06432	2.28213		31081.3	25512.7	13298.1	2.33726	1.91852		23715.4	21313	21254.8	1.11577	1.00274		18032.7	0	31816.1	0.56678	0
70887.6	81153.1	33390.2	2.12301	2.43045		32496.1	32477.4	18407.7	1.76535	1.76434		19444.3	19518.5	14138.5	1.37527	1.38052		25849.8	0	17184.2	1.50428	0
53061.2	62208.9	23745.1	2.23462	2.61986		32500.7	28852.2	17747.6	1.83128	1.6257		24448	29667.6	21334.9	1.14591	1.39057		38516.3	0	41836.3	0.920643	0
53809.9	59124	23501.9	2.2896	2.51571		24176.4	28255.9	20883.6	1.15767	1.35302		21362.3	19440.3	17543.7	1.21766	1.10811		23025.2	0	25861.2	0.890335	0
79261.4	85776.5	37038.5	2.13997	2.31588		28319.5	37192.9	24091.1	1.17552	1.54384		26372.1	16002.2	13463.8	1.95874	1.18853		20006.2	0	25738.6	0.777284	0
80369.1	92171.9	39360.3	2.04188	2.34175		23075.3	24651.4	17258.1	1.33707	1.42839		16029.3	16837.4	14524.1	1.10363	1.15928		36447.1	0	19234.6	1.89488	0
61708.2	69280.1	26263.4	2.34959	2.63789		25221.2	25984.8	17139.9	1.47149	1.51604		30747.6	17152	17023.1	1.80623	1.00757		20389.2	0	18357.9	1.11065	0
87622.7	102160	41619.4	2.10533	2.45464		31503.4	37693.3	30918.2	1.01893	1.21913		17984.7	14982.1	12706.6	1.41538	1.17907		22856.2	0	21081.4	1.08419	0
55724.3	67551.3	25918.5	2.14998	2.6063		25709.1	32099.2	26015	0.988242	1.23387		20399.4	19424.6	12149.8	1.67898	1.59875		27131.2	0	18683.5	1.45215	0
69763.7	74768.9	31412.1	2.22092	2.38025		29218.7	21249.1	15313.1	1.90809	1.38765		16351.1	12363.2	9492.48	1.72253	1.30242		19825.5	0	24935.6	0.795069	0

## Sheet: Fig 2c
Tunicamycin_WB
	TAMRA	GAPDH	TAMRA/GAPDH	TAMRA/GAPDH normalized to DMSO
DMSO + 0 ug/mL tunicamycin	427000	48200	8.85892	1
MM-JH-1 + 0 ug/mL tunicamycin	7280000	65600	110.976	12.527
MM-JH-1 + 2 ug/mL tunicamycin	3760000	64000	58.75	6.63173
MM-JH-1 + 5 ug/mL tunicamycin	2180000	46200	47.1861	5.3264
MM-JH-1 + 10 ug/mL tunicamycin	2070000	61500	33.6585	3.79939
MM-JH-1 + 15 ug/mL tunicamycin	2140000	75300	28.4197	3.20803
	TAMRA	GAPDH	TAMRA/GAPDH	TAMRA/GAPDH normalized to DMSO
DMSO + 0 ug/mL tunicamycin	267000	59500	4.48739	1
MM-JH-1 + 0 ug/mL tunicamycin	4700000	85700	54.8425	12.2215
MM-JH-1 + 2 ug/mL tunicamycin	1900000	66700	28.4858	6.34795
MM-JH-1 + 5 ug/mL tunicamycin	1400000	55200	25.3623	5.6519
MM-JH-1 + 10 ug/mL tunicamycin	1000000	60600	16.5017	3.67733
MM-JH-1 + 15 ug/mL tunicamycin	900000	62800	14.3312	3.19366
	TAMRA	GAPDH	TAMRA/GAPDH	TAMRA/GAPDH normalized toDMSO
DMSO + 0 ug/mL tunicamycin	648000	114000	5.68421	1
MM-JH-1 + 0 ug/mL tunicamycin	10100000	145000	69.6552	12.2542
MM-JH-1 + 2 ug/mL tunicamycin	6060000	161000	37.6398	6.62181
MM-JH-1 + 5 ug/mL tunicamycin	3090000	101000	30.5941	5.38229
MM-JH-1 + 10 ug/mL tunicamycin	2130000	100100	21.2787	3.74348
MM-JH-1 + 15 ug/mL tunicamycin	1740000	100900	17.2448	3.03381

## Sheet: Fig 3b
EndoH_Total cell
Before click									After Click
	RL2	ConA	GAPDH		RL2/GAPDH	ConA/GAPDH				TAMRA	ConA	GAPDH		TAMRA/GAPDH	ConA/GAPDH
DMSO, (-) Endo H	338000	176000	139000		2.43165	1.26619			DMSO, (-) Endo H	0	176000	24000		0	7.33333
DMSO, (+) Endo H	320000	136000	137000		2.33577	0.992701			DMSO, (+) Endo H	0	136000	51600		0	2.63566
MM-JH-1, (-) Endo H	356000	175000	121000		2.94215	1.44628			MM-JH-1, (-) Endo H	231000	175000	18500		12.4865	9.45946
MM-JH-1, (+) Endo H	387000	132000	125000		3.096	1.056			MM-JH-1, (+) Endo H	0	132000	49900		0	2.64529
DMSO, (-) Endo H	335000	180000	132000		2.53788	1.36364			DMSO, (-) Endo H	0	160000	21000		0	7.61905
DMSO, (+) Endo H	334000	114000	127000		2.62992	0.897638			DMSO, (+) Endo H	0	120000	47600		0	2.52101
MM-JH-1, (-) Endo H	391000	209000	135000		2.8963	1.54815			MM-JH-1, (-) Endo H	178000	137000	14800		12.027	9.25676
MM-JH-1, (+) Endo H	389000	131000	129000		3.0155	1.0155			MM-JH-1, (+) Endo H	0	118000	43700		0	2.70023
DMSO, (-) Endo H	342000	178000	137000		2.49635	1.29927			DMSO, (-) Endo H	0	170000	23200		0	7.32759
DMSO, (+) Endo H	325000	116000	129000		2.51938	0.899225			DMSO, (+) Endo H	0	120000	50400		0	2.38095
MM-JH-1, (-) Endo H	380000	196000	131000		2.90076	1.49618			Sample, (-) Endo H	220000	160000	17100		12.8655	9.35673
MM-JH-1, (+) Endo H	375000	130000	126000		2.97619	1.03175			Sample, (+) Endo H	0	119000	47800		0	2.48954

## Sheet: Fig 3c
Castanospermine
0 ug/mL						50 ug/mL						100 ug/mL						200 ug/mL
ConA	AF488	DAPI	ConA/DAPI	AF488/DAPI		ConA	AF488	DAPI	ConA/DAPI	AF488/DAPI		ConA	AF488	DAPI	ConA/DAPI	AF488/DAPI		ConA	AF488	DAPI	ConA/DAPI	AF488/DAPI
35725	29992.9	31629.7	1.12948	0.94825		17401	15274.5	12904.1	1.34849	1.18369		17808.1	31859	33788.1	0.527051	0.942905		26657.6	29403.1	23423.7	1.13806	1.25527
18353.7	21973.3	19361.5	0.947944	1.13489		14776.9	22176.1	20221.7	0.730744	1.09665		27358.1	38669	35533.7	0.76992	1.08823		28613.6	31304.6	28862	0.991394	1.08463
20013.6	21137.1	17977.5	1.11326	1.17575		23762.3	20819.6	17771.3	1.33712	1.17153		24548.4	33081.6	28260.3	0.868652	1.1706		18799	26865.4	20940.4	0.897738	1.28294
20477.7	21426.2	18977	1.07908	1.12906		13071.2	11622.4	10467.3	1.24876	1.11035		26481.1	27716.7	23793.4	1.11296	1.16489		22908.6	29841.7	28936.2	0.791695	1.03129
28853.9	26754.5	23670.3	1.21899	1.1303		20190.6	29985.8	29943.2	0.674296	1.00142		25924.1	27987.5	21921.8	1.18258	1.2767		27277.5	32217.5	28844.1	0.945688	1.11695
31674.9	29487	31398.4	1.00881	0.939124		25259.6	33264.1	32992.2	0.765621	1.00824		25945.1	24964.4	23831.7	1.08868	1.04753		20756.4	30430.9	27310.5	0.760014	1.11425
18801.7	20201.1	16425	1.1447	1.2299		24949.7	35492.5	32596	0.765421	1.08886		32034.7	34459.9	26648.3	1.20213	1.29314		25032.2	29821.3	26820.1	0.933339	1.1119
15248.8	17505.3	14456.7	1.05479	1.21087		24646.5	34430.1	28167	0.875014	1.22235		24147.4	24384.5	21246.6	1.13653	1.14769		33786.7	29195.2	28338.3	1.19226	1.03024
20603.9	26716.4	23031.2	0.894608	1.16001		21819	32239.3	29949.9	0.728518	1.07644		23695	31728.3	33428.6	0.708826	0.949136		21129.4	28933.7	27941.3	0.756207	1.03552
12753.1	15144.8	12383.5	1.02984	1.22298		21303.4	30256.2	25472.6	0.836326	1.1878		31793	38905.4	34810.8	0.913308	1.11762		30261	28148.5	28426.8	1.06452	0.990211

## Sheet: Fig 3d
DMJM_AF488
0 mM						10 mM						20 mM						50 mM
ConA	AF488	DAPI	ConA/DAPI	AF488/DAPI		ConA	AF488	DAPI	ConA/DAPI	AF488/DAPI		ConA	AF488	DAPI	ConA/DAPI	AF488/DAPI		ConA	AF488	DAPI	ConA/DAPI	AF488/DAPI
60960.3	50649.4	49201.1	1.239	1.02944		31663.4	16754.6	36351.7	0.87103	0.460903		52252.8	12350.4	42851.9	1.21938	0.288211		32077.6	0	32282.7	0.993645	0
39439.5	30503.2	30222.7	1.30496	1.00928		31064.7	16305.7	36436	0.852584	0.447518		33541	7990.75	44129.9	0.760052	0.181073		25331.5	0	23614.8	1.0727	0
45063.7	36057.1	34532.4	1.30497	1.04415		32687.8	13030.4	25909.9	1.2616	0.502911		33835.2	7749.77	47065.4	0.718898	0.16466		33168	0	25134.5	1.31962	0
47825	39819.9	36264.2	1.31879	1.09805		25945.2	13569.2	29997.7	0.864906	0.452341		53168.3	11825.3	34823.9	1.52677	0.339574		48003.8	0	45421.7	1.05685	0
52783.8	46492	38880.7	1.35758	1.19576		22657.9	9739.53	17649.1	1.2838	0.551843		28484.1	7176.8	31628.9	0.900572	0.226906		37118.3	0	39621.4	0.936826	0
44822.3	38328.7	35766.3	1.2532	1.07164		39591.4	15190.7	29911.3	1.32363	0.507857		48432.3	10622.4	41704.4	1.16132	0.254707		56745.6	0	57029.6	0.99502	0
60084.1	49518.1	46117	1.30286	1.07375		30866.7	16207.9	34337	0.898936	0.472025		29226.9	7235.71	36886.5	0.792345	0.196161		27234	0	22718.4	1.19876	0
57966.3	47825.6	43932.3	1.31945	1.08862		26339.1	12063.7	22875.8	1.1514	0.527357		55823.2	10841	31810.3	1.75488	0.340802		40689.6	0	21926.2	1.85575	0
52980.1	42772.4	40346.1	1.31314	1.06014		25633.5	13392.6	19632.6	1.30566	0.68216		29113.7	6920.6	27720.4	1.05026	0.249657		25550.9	0	21979.3	1.1625	0
58255.5	45501	45355.2	1.28443	1.00321		25006.9	12532.5	20679.6	1.20925	0.606032		31587.1	8053.12	22385.2	1.41107	0.359752		59468.1	0	65090.2	0.913626	0

## Sheet: Fig 3e
Swainsonine
0 ug/mL						10 mM						20 mM						50 mM
ConA	AF488	DAPI	ConA/DAPI	AF488/DAPI		ConA	AF488	DAPI	ConA/DAPI	AF488/DAPI		ConA	AF488	DAPI	ConA/DAPI	AF488/DAPI		ConA	AF488	DAPI	ConA/DAPI	AF488/DAPI
30091	34369	42562.7	0.70698	0.807491		27805.8	33953.3	33453.6	0.831175	1.01494		60487.1	44334.7	40621	1.48906	1.09142		84935.1	68835.4	37038.9	2.29313	1.85846
20792.7	26062.3	32282	0.644094	0.807331		33559	32867.6	25760.7	1.30272	1.27588		49579	38839.1	33322.3	1.48786	1.16556		48339.7	48148.6	24410.4	1.98029	1.97246
24069.5	23796.4	37555.4	0.640907	0.633636		38296.4	33604.3	31412	1.21917	1.06979		32427.9	27880.7	26777	1.21104	1.04122		76942.6	46751.6	28713.9	2.67963	1.62819
20537.4	28784.5	40390.7	0.508468	0.712651		41033.1	34945.9	33374.4	1.22948	1.04709		37078.4	35950.6	31521.5	1.17629	1.14051		101462	60026.2	26987	3.75968	2.22426
27051.2	23863.5	27862.6	0.970881	0.85647		35941.6	25321.4	21278.5	1.6891	1.19		49061.6	42451.5	42153.5	1.16388	1.00707		83219.2	60066.3	30141.7	2.76094	1.9928
26816.3	24767.7	33294.4	0.80543	0.743899		37944.6	22389.6	18110	2.09523	1.23631		27074	25725.1	18508.3	1.4628	1.38992		64071.1	37645	22594.3	2.83572	1.66613
28289.3	22671.6	38467.9	0.735401	0.589364		20691.8	25955	19089.4	1.08394	1.35966		24814.7	27413	19517.6	1.2714	1.40453		110718	53922.3	19736.8	5.60972	2.73207
20302.8	23368.5	37485.8	0.541613	0.623394		44649.7	35106.2	31533.6	1.41594	1.1133		47502	41963	39131.4	1.21391	1.07236		64563.5	54714.6	24491.8	2.63612	2.234
27902.1	24818.5	39010.3	0.715249	0.636205		26083.7	32993.1	31063.2	0.839697	1.06213		25388.8	22139.4	20014	1.26855	1.10619		87173.9	65718.1	29599.5	2.94512	2.22025
24441.7	24086.6	27309	0.895004	0.882004		25279.3	30906.6	30805.7	0.820606	1.00328		27920.1	27165.9	19473.2	1.43377	1.39504		83819.6	68873.8	37060.9	2.26167	1.85839

## Sheet: Fig 4a
siRNA_WB
Set-1
	TAMRA	Mgat1	GAPDH		TAMRA/GAPDH	Mgat1/GAPDH		TAMRA/GAPDH normalized to DMSO
DMSO	369000	214000	257000		1.4358	0.832685		1
Control	6590000	196000	277000		23.7906	0.707581		16.5696
SiRNA KD	1900000	130000	266000		7.14286	0.488722		4.97484
Set-2
	TAMRA	Mgat1	GAPDH		TAMRA/GAPDH	Mgat1/GAPDH		TAMRA/GAPDH normalized to. DMSO
DMSO	159000	80000	103000		1.54369	0.776699		1
Control	2540000	82700	109000		23.3028	0.758716		15.0955
SiRNA KD	535000	48300	106000		5.04717	0.45566		3.26955
Set-3
	TAMRA	Mgat1	GAPDH		TAMRA/GAPDH	Mgat1/GAPDH		TAMRA/GAPDH normalized to. DMSO
DMSO	324000	250000	303000		1.06931	0.825083		1
Control	5670000	252700	309000		18.3495	0.817799		17.1602
SiRNA KD	1100000	128300	306000		3.59477	0.419281		3.36178

[truncated: 12 more sheets: Fig 4b, Fig 5a, Supp Fig 4, Supp Fig 5, Supp Fig 11, Supp Fig 12, Supp Fig 14a, Supp Fig 14b, Supp Fig 15a, Supp Fig 15b, Supp Fig 16, Supp Fig 17]
